# Supplementary material for: Redox-buffer effect of Fe2+ ions on the selective olefin/paraffin separation and hydrogen tolerance of a Cu+-based mesoporous adsorbent
Source: Royal Society of Chemistry journal article supplement (doi:10.1039/c2ta00890d), 2012-12-10
Supplement: c2ta00890d.pdf [file c2ta00890d.pdf]

Supplementary Material (ESI) for Journal of Materials Chemistry A  
This journal is (c) The Royal Society of Chemistry 2012

## Electronic Supporting Information

### Redox-buffer effect of $\text{Fe}^{2+}$ ion on selective olefin/paraffin separation and hydrogen tolerance of $\text{Cu}^+$ -based mesoporous adsorbent

Mingshi Jin,<sup>‡a</sup> Sung Soo Kim,<sup>‡a</sup> Young Dok Kim,<sup>a</sup> Jung-Nam Park,<sup>a</sup> Jin Hoe Kim,<sup>a</sup> Chang Hyun Ko,<sup>\*b</sup> Jong-Nam Kim<sup>\*c</sup> and Ji Man Kim<sup>\*a</sup>

<sup>a</sup> Department of Chemistry, BK21 School of Chemical Materials Science and Department of Energy Science, Sungkyunkwan University, Suwon, 440-746, Republic of Korea. Fax: 82 31 299 4174; Tel: 82 31 290 5930; E-mail: jimankim@skku.edu

<sup>b</sup> School of Applied Chemical Engineering, Chonnam National University, Gwangju, 500-757, Republic of Korea. E-mail: chko@jnu.ac.kr

<sup>c</sup> Separation Processes Research Center, Korea Institute of Energy Research, Daejeon, 305-343, Korea. E-mail: jnkim@kier.re.kr

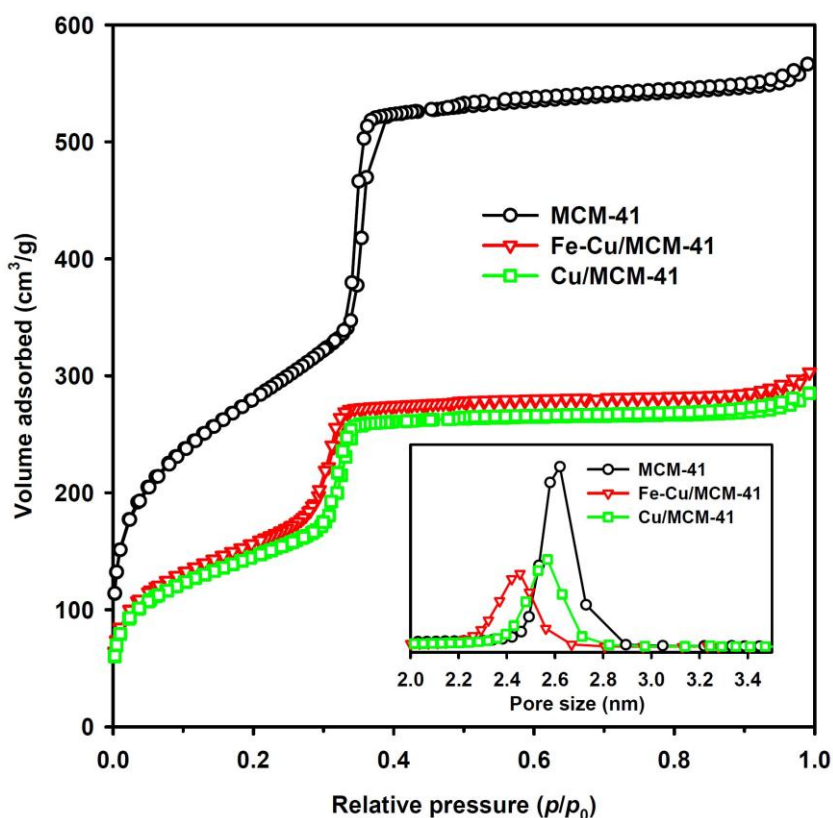

**Fig. S1**  $\text{N}_2$  adsorption-desorption isotherms for MCM-41, Fe-Cu/MCM-41 and Cu/MCM-41. Inset is the corresponding BJH pore size distribution curves.

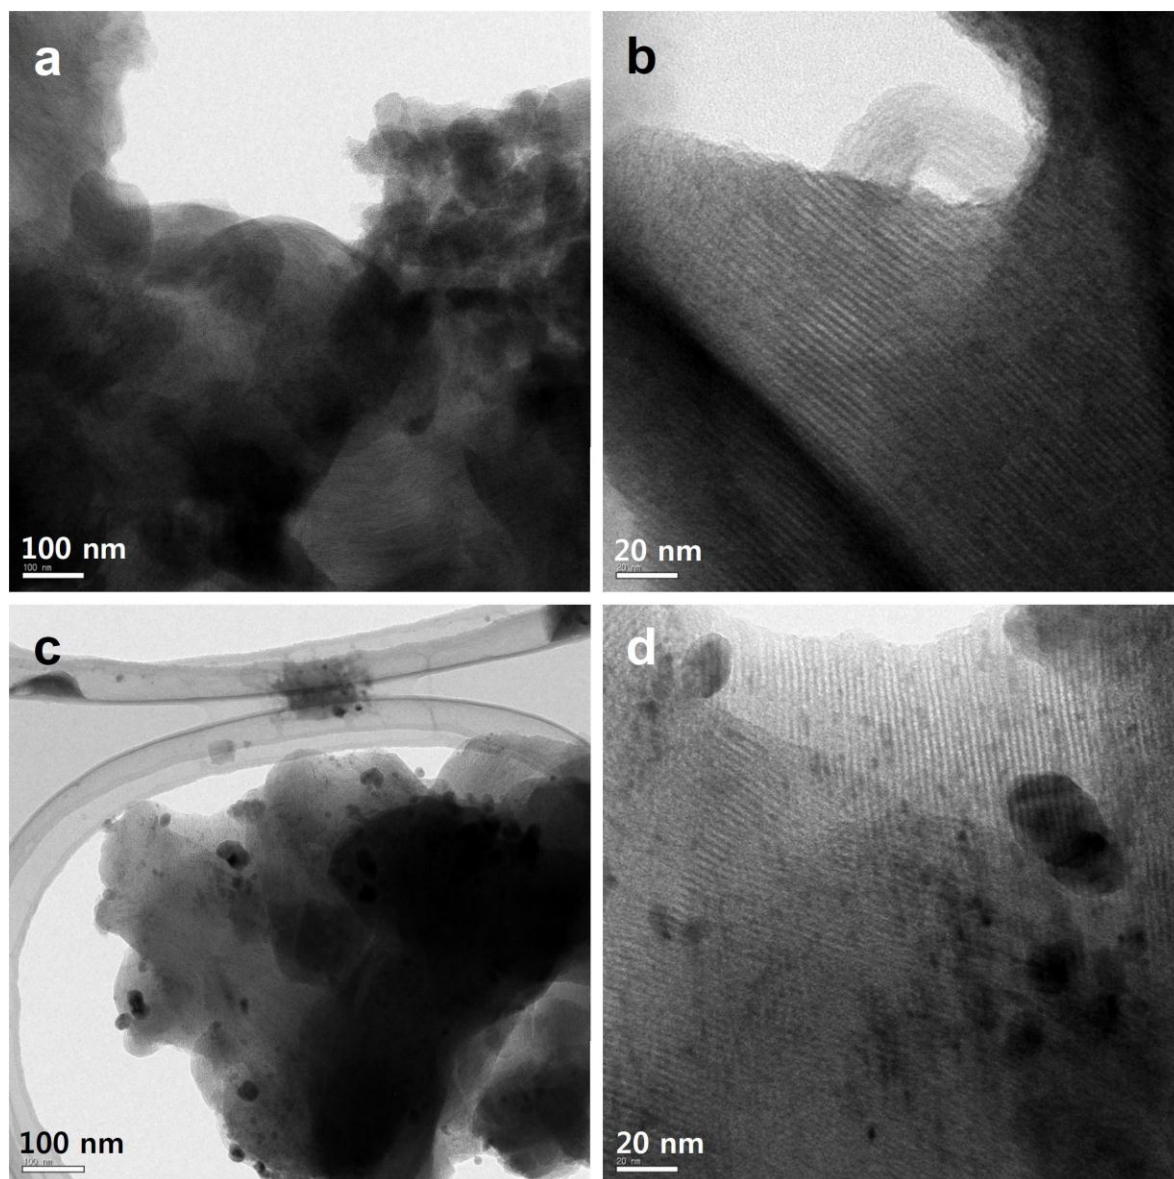

**Fig. S2** Transmission electron microscopic images of (a,b) Fe-Cu/MCM-41 and (c,d) Cu/MCM-41.

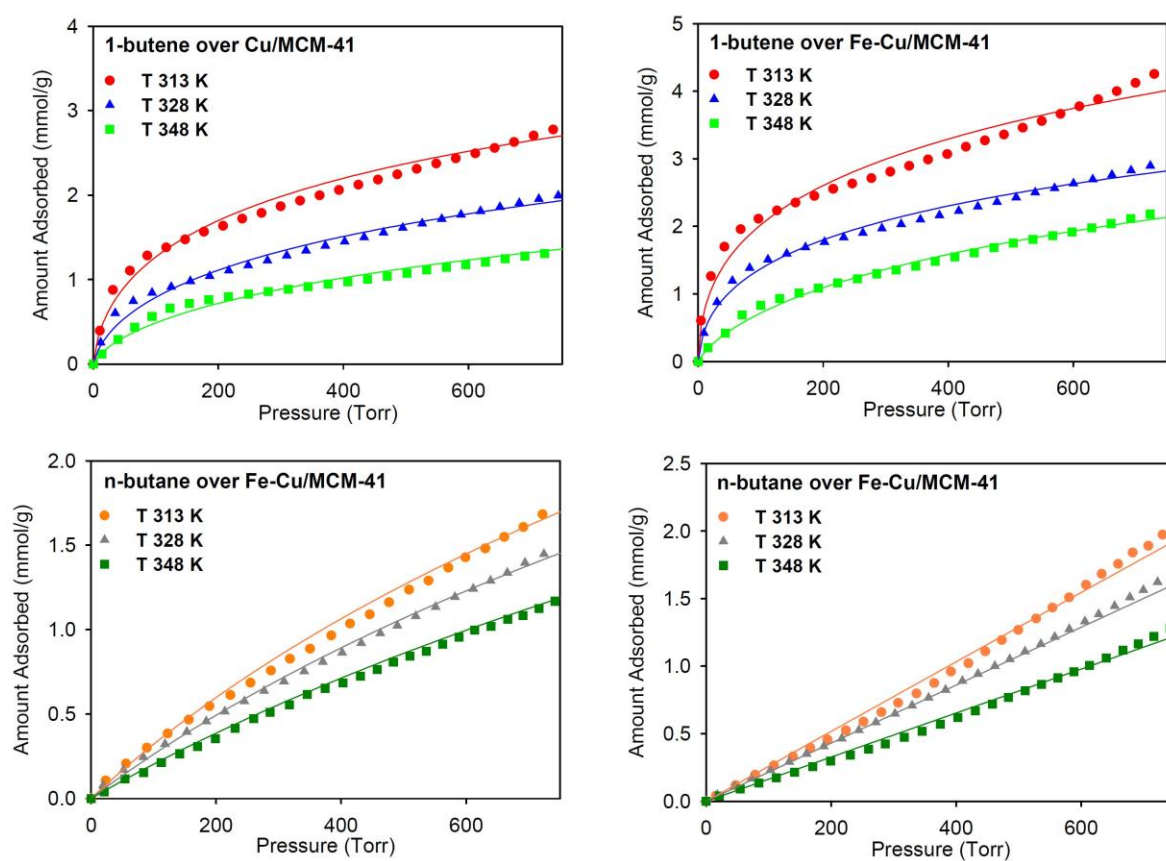

**Fig. S3** Adsorption isotherms of 1-butene and *n*-butane over Fe-Cu/MCM-41 and Cu/MCM-41 at different temperatures (313 K, 328 K and 348 K).

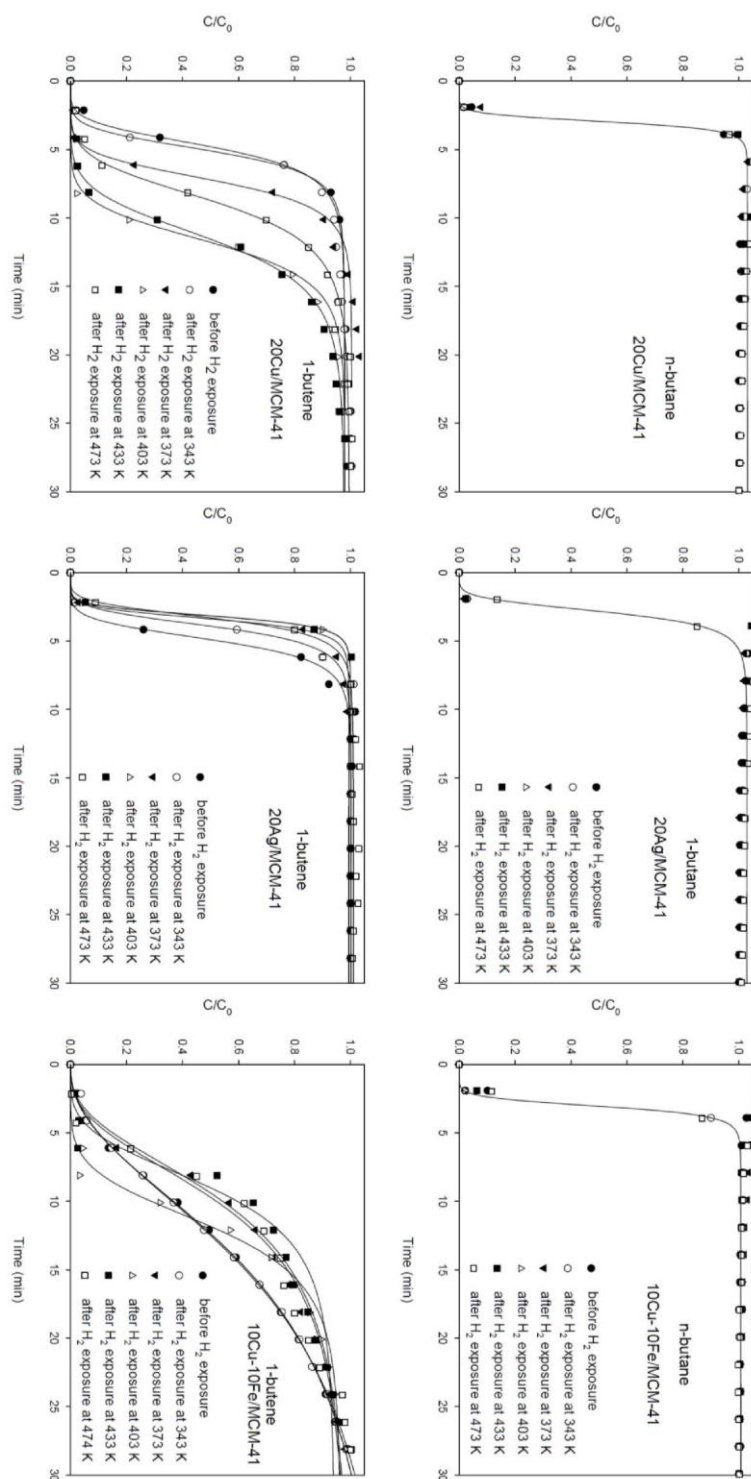

**Fig. S4** Breakthrough curves of 1-butene and *n*-butane over Cu/MCM-41, Ag/MCM-41 and Fe-Cu/MCM-41 after  $H_2$ -exposure at different temperatures (343 K – 473 K).

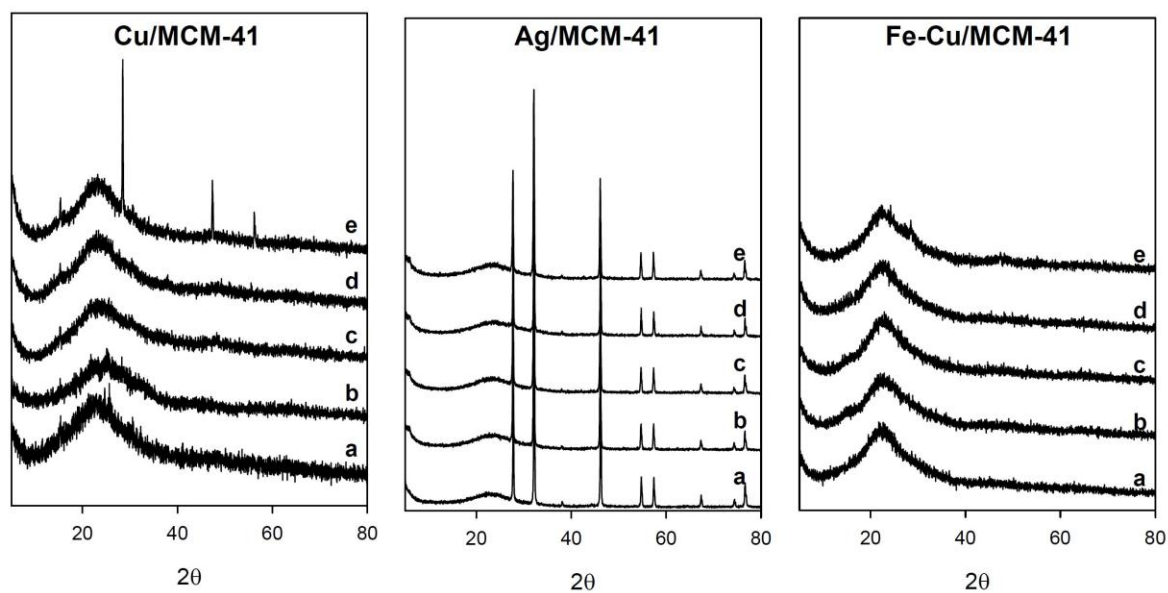

**Fig. S5** X-ray diffraction patterns of Cu/MCM-41, Ag/MCM-41 and Fe-Cu/MCM-41 after H<sub>2</sub>-exposure at different temperatures: (a) 343 K, (b) 373 K, (c) 403 K, (d) 433 K, and (e) 473 K
